# Supplementary material
Source: ML conference proceedings conference paper supplement (https://proceedings.neurips.cc/paper_files/paper/2007/hash/6974ce5ac660610b44d9b9fed0ff9548-Abstract.html)

# EEG-Based Brain-Computer Interaction: Improved Accuracy by Automatic Single-Trial Error Detection

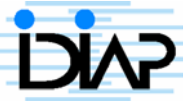

Pierre W. Ferrez & José del R. Millán — Poster ID W68  
IDIAP Research Institute & Ecole Polytechnique Fédérale de Lausanne

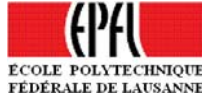

**Simultaneous** detection of **motor imagery** and **error-related potentials (ErrP)** for improved BCI interaction

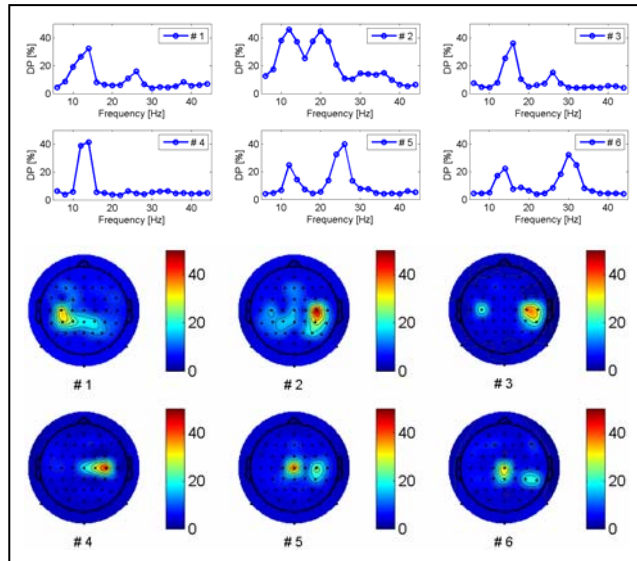

**Motor imagery**  
 $\alpha$  &  $\beta$  bands, central area

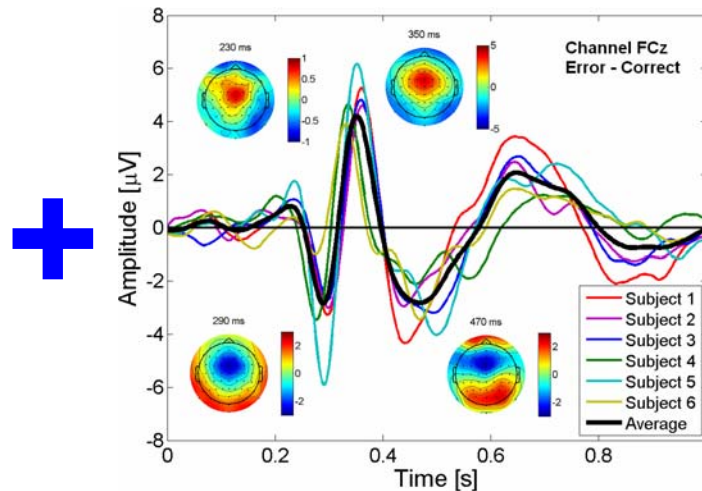

**Error-related potentials**  
**Anterior cingulate cortex**

**Bit rate**  
**= doubled!!**

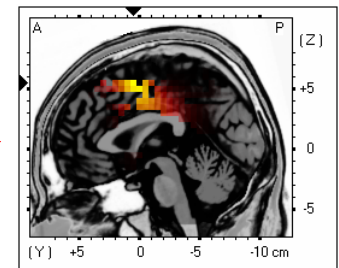

Supplement: Supplementary file [file 6974ce5ac660610b44d9b9fed0ff9548-Supplemental.zip]
